# Supplementary material for: An integrative epigenomic approach identifies ELF3 as an oncogenic regulator in ASCL1‐positive neuroendocrine carcinoma
Source: PubMed Central journal article supplement — Cancer Sci. 2023 Mar 15;114(6):2596–608. doi: 10.1111/cas.15764 (PMC10236617; doi:10.1111/cas.15764), 2023-03-15
Supplement: CAS-114-2596-s002.pdf [file CAS-114-2596-s002.pdf]

## Supplementary Figure S8

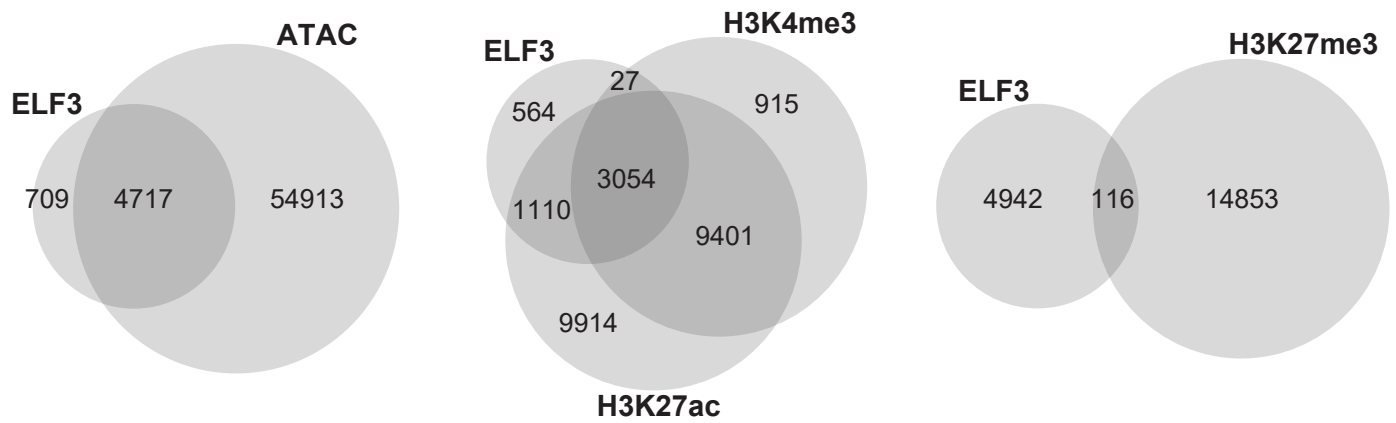

Figure S8. Overlapping peaks between CUT&Tag and ATAC-seq.

Venn diagram showing overlapped ELF3 CUT&Tag peaks and ATAC-seq peaks (left), H3K4me3 and/or H3K27ac CUT&Tag peaks (middle), and H3K27me3 CUT&Tag peaks (right) in A99 cells.
