# Supplementary material for: An integrative epigenomic approach identifies ELF3 as an oncogenic regulator in ASCL1‐positive neuroendocrine carcinoma
Source: PubMed Central journal article supplement — Cancer Sci. 2023 Mar 15;114(6):2596–608. doi: 10.1111/cas.15764 (PMC10236617; doi:10.1111/cas.15764), 2023-03-15
Supplement: CAS-114-2596-s003.pdf [file CAS-114-2596-s003.pdf]

# Supplementary Figure S3

A

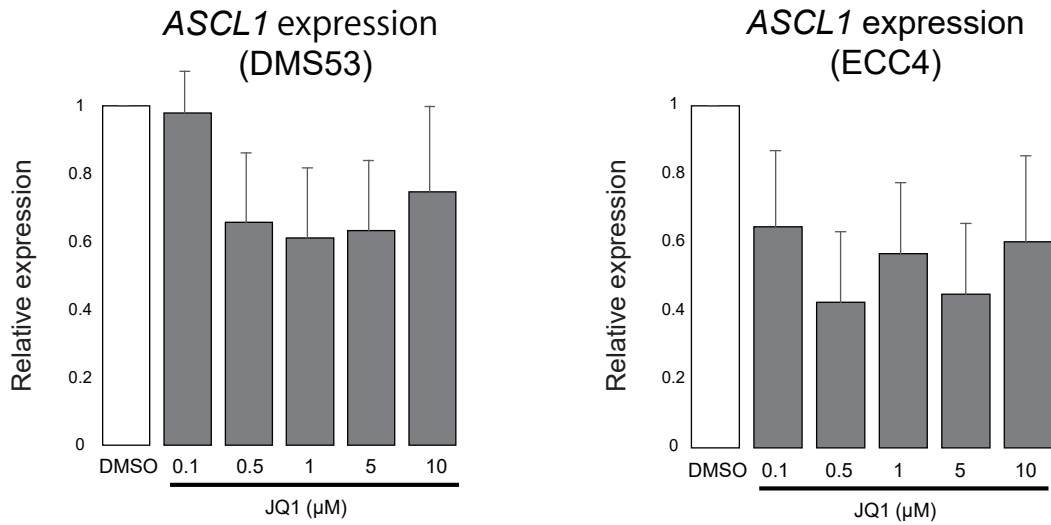

B

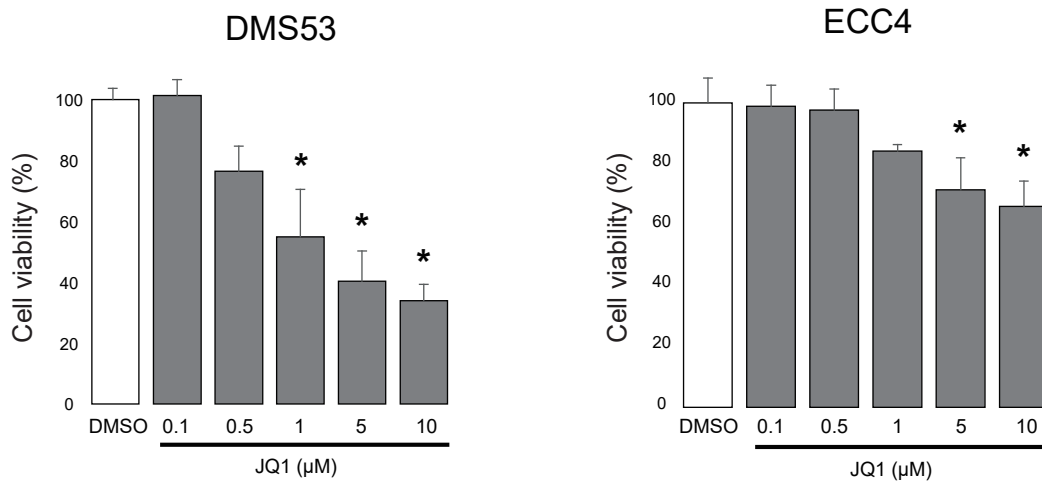

Figure S3. Effects of specific inhibition of super-enhancers mediated by JQ1.

A. Total RNA was collected 72 h after treatment with JQ1 at 0.1, 0.5, 1, 5, and 10  $\mu\text{M}$  in DMS53 and ECC4 cells, and *ASCL1* expression was quantified via quantitative RT-PCR. B. Cell viability was examined 96 h after treatment with JQ1 at 0.1, 0.5, 1, 5, and 10  $\mu\text{M}$  in DMS53 and ECC4 cells. \* indicates a  $P$  value  $< 0.05$ . Data are expressed as the mean + SEM of three independent experiments.
