# Supplementary material for: An integrative epigenomic approach identifies ELF3 as an oncogenic regulator in ASCL1‐positive neuroendocrine carcinoma
Source: PubMed Central journal article supplement — Cancer Sci. 2023 Mar 15;114(6):2596–608. doi: 10.1111/cas.15764 (PMC10236617; doi:10.1111/cas.15764), 2023-03-15
Supplement: CAS-114-2596-s004.pdf [file CAS-114-2596-s004.pdf]

# Supplementary Figure S10

## A99

| Homer <i>de novo</i> motif | P value     | Motif            | Targets (%) | Background (%) |
|----------------------------|-------------|------------------|-------------|----------------|
|                            | $10^{-717}$ | EHF              | 57.1        | 22.7           |
|                            | $10^{-99}$  | bZIP (FOSL1:JUN) | 15.8        | 7.6            |
|                            | $10^{-94}$  | KLF/Sp family    | 32.2        | 20.8           |
|                            | $10^{-67}$  | NFY (CCAAT)      | 51.5        | 40.4           |
|                            | $10^{-61}$  | GRH family       | 36.7        | 26.9           |

## DMS53

| Homer <i>de novo</i> motif | P value     | Motif            | Targets (%) | Background (%) |
|----------------------------|-------------|------------------|-------------|----------------|
|                            | $10^{-722}$ | EHF              | 64.4        | 20.5           |
|                            | $10^{-67}$  | bZIP (FOSL1:JUN) | 13.9        | 6              |
|                            | $10^{-57}$  | KLF/Sp family    | 40.2        | 27.9           |
|                            | $10^{-42}$  | BCL6             | 25.6        | 16.6           |
|                            | $10^{-41}$  | NFY (CCAAT)      | 37.8        | 27.5           |

## A549 (non-NEC, lung adenocarcinoma)

| Homer <i>de novo</i> motif | P value     | Motif            | Targets (%) | Background (%) |
|----------------------------|-------------|------------------|-------------|----------------|
|                            | $10^{-551}$ | EHF              | 53.3        | 16.6           |
|                            | $10^{-101}$ | bZIP (FOSL1:JUN) | 17.4        | 6.5            |
|                            | $10^{-79}$  | KLF/Sp family    | 50.2        | 34.2           |
|                            | $10^{-73}$  | GREB2            | 39.0        | 24.6           |
|                            | $10^{-73}$  | NFY (CCAAT)      | 31.0        | 19.6           |

Figure S10. Motif enrichment in the ELF3 genomic binding regions.

Top 5 motifs in the ELF3 genomic binding regions identified by ELF3 CUT&Tag assay in A99, DMS53, and A549 cells.
