# Supplementary material for: An integrative epigenomic approach identifies ELF3 as an oncogenic regulator in ASCL1‐positive neuroendocrine carcinoma
Source: PubMed Central journal article supplement — Cancer Sci. 2023 Mar 15;114(6):2596–608. doi: 10.1111/cas.15764 (PMC10236617; doi:10.1111/cas.15764), 2023-03-15
Supplement: CAS-114-2596-s005.pdf [file CAS-114-2596-s005.pdf]

## Supplementary Figure S6

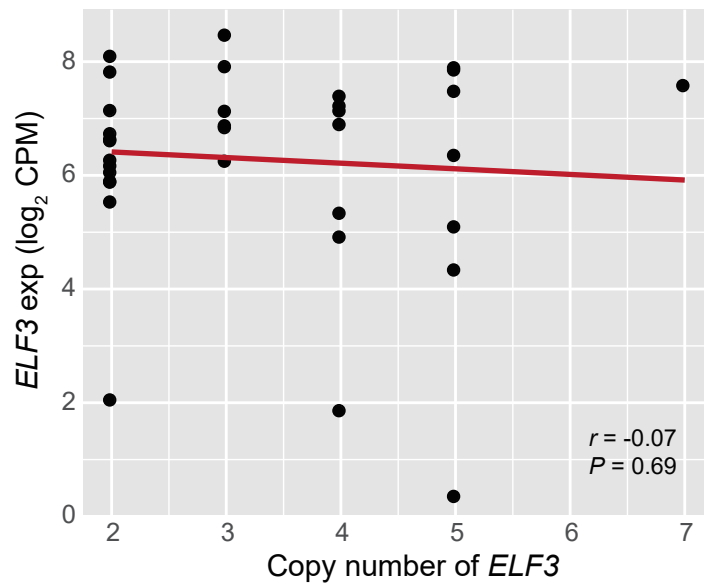

Figure S6. Correlation between copy number variation and gene expression of *ELF3* in GIS-NEC.

A dot plot showing the correlation between copy number variation of the *ELF3* gene locus and *ELF3* expression in 34 GIS-NEC samples. The X-axis indicates copy numbers, calculated based on whole genome sequencing, and the Y-axis indicates the gene expression of *ELF3* based on RNA-seq.
