# Supplementary material for: An integrative epigenomic approach identifies ELF3 as an oncogenic regulator in ASCL1‐positive neuroendocrine carcinoma
Source: PubMed Central journal article supplement — Cancer Sci. 2023 Mar 15;114(6):2596–608. doi: 10.1111/cas.15764 (PMC10236617; doi:10.1111/cas.15764), 2023-03-15
Supplement: CAS-114-2596-s006.pdf [file CAS-114-2596-s006.pdf]

## Supplementary Figure S5

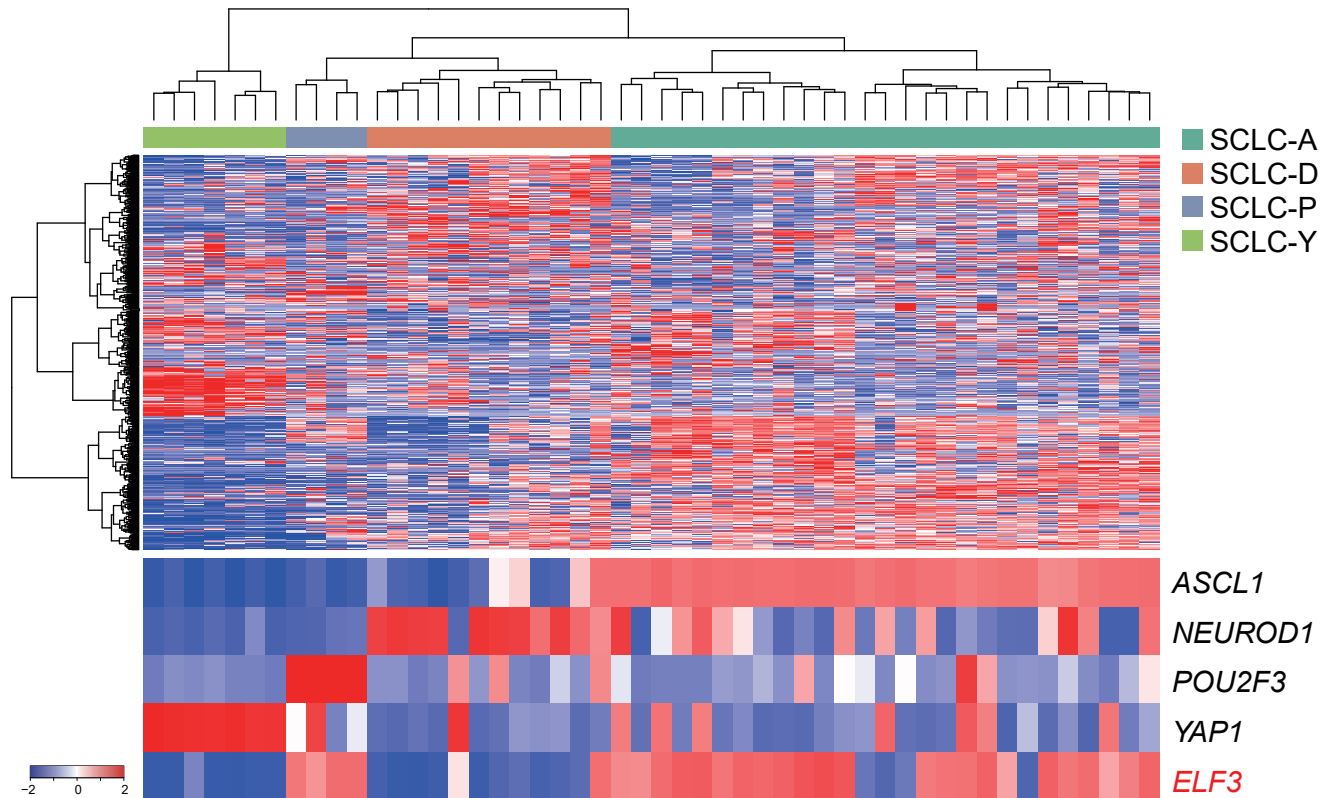

Figure S5. *ELF3* expression in four molecular subtypes of 50 SCLC cell lines based on the Cancer Cell Line Encyclopedia (CCLE) dataset.

A heatmap showing the gene expression pattern generated based on the RNA-seq data of 50 SCLC cell lines. Based on unsupervised clustering with 1,200 highly variant genes, SCLC cell lines were divided into four clusters, specifically SCLC-A, SCLC-D, SCLC-P, and SCLC-Y. The lower panel shows the expression of genes encoding the representative transcription factors in each subgroup and *ELF3*.
