# Supplementary material for: An integrative epigenomic approach identifies ELF3 as an oncogenic regulator in ASCL1‐positive neuroendocrine carcinoma
Source: PubMed Central journal article supplement — Cancer Sci. 2023 Mar 15;114(6):2596–608. doi: 10.1111/cas.15764 (PMC10236617; doi:10.1111/cas.15764), 2023-03-15
Supplement: CAS-114-2596-s007.pdf [file CAS-114-2596-s007.pdf]

# Supplementary Figure S1

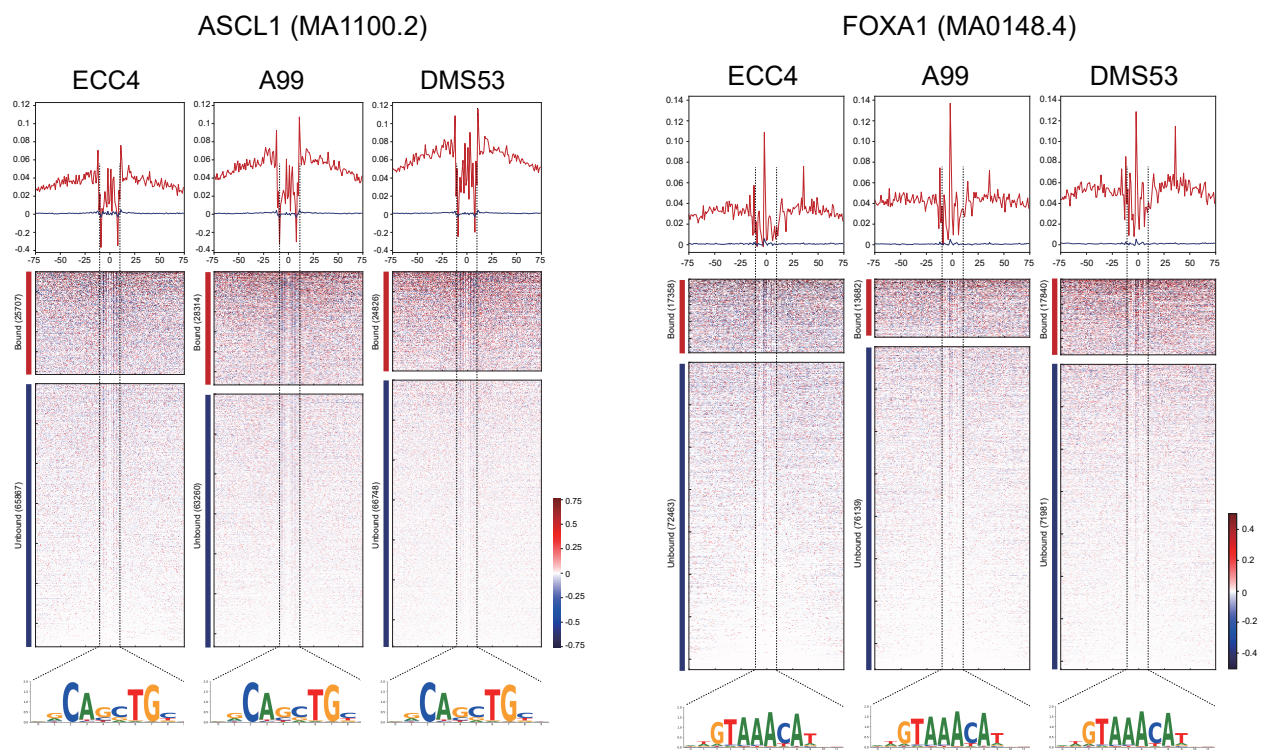

Figure S1. Chromatin accessibility footprints of ASCL1 and FOXA1.

Chromatin accessibility footprints of ASCL1 (left) and FOXA1 (right) within all accessible loci for ECC4, A99, and DMS53 cells.
