# Supplementary material for: An integrative epigenomic approach identifies ELF3 as an oncogenic regulator in ASCL1‐positive neuroendocrine carcinoma
Source: PubMed Central journal article supplement — Cancer Sci. 2023 Mar 15;114(6):2596–608. doi: 10.1111/cas.15764 (PMC10236617; doi:10.1111/cas.15764), 2023-03-15
Supplement: CAS-114-2596-s008.pdf [file CAS-114-2596-s008.pdf]

# Supplementary Figure S12

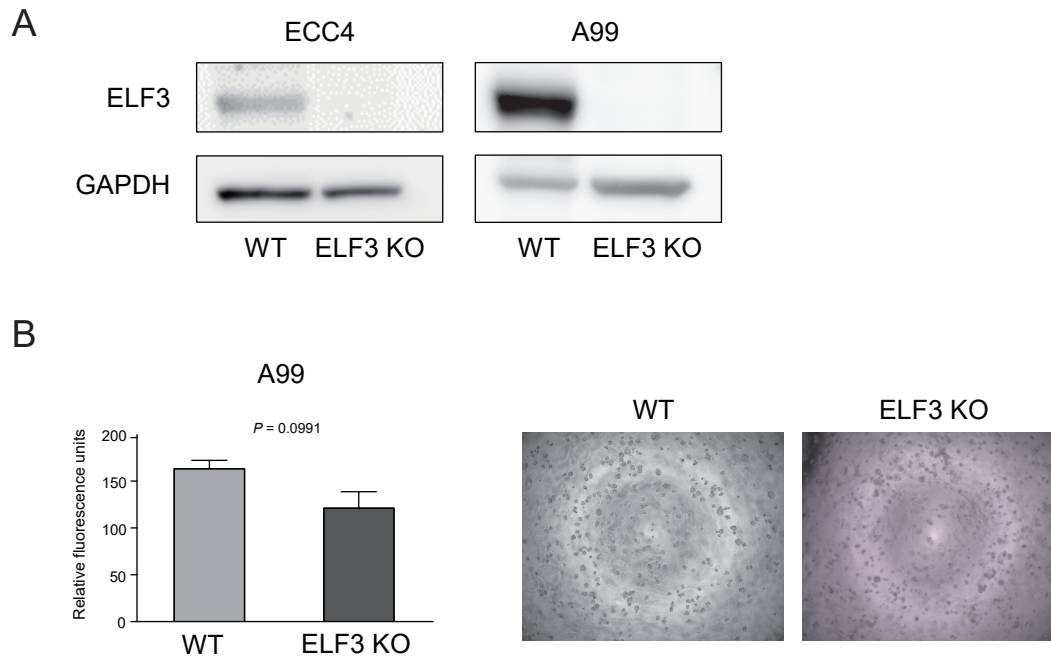

Figure S12. Establishment of ELF3-knockout clone and soft agar assay.

Bar chart showing colony formation in soft agar at day 7 in the ELF3-knockout clone of A99 cells. Data are representative of three independent experiments.  $P = 0.0991$ .
