# Supplementary material for: An integrative epigenomic approach identifies ELF3 as an oncogenic regulator in ASCL1‐positive neuroendocrine carcinoma
Source: PubMed Central journal article supplement — Cancer Sci. 2023 Mar 15;114(6):2596–608. doi: 10.1111/cas.15764 (PMC10236617; doi:10.1111/cas.15764), 2023-03-15
Supplement: CAS-114-2596-s009.pdf [file CAS-114-2596-s009.pdf]

# Supplementary Figure S2

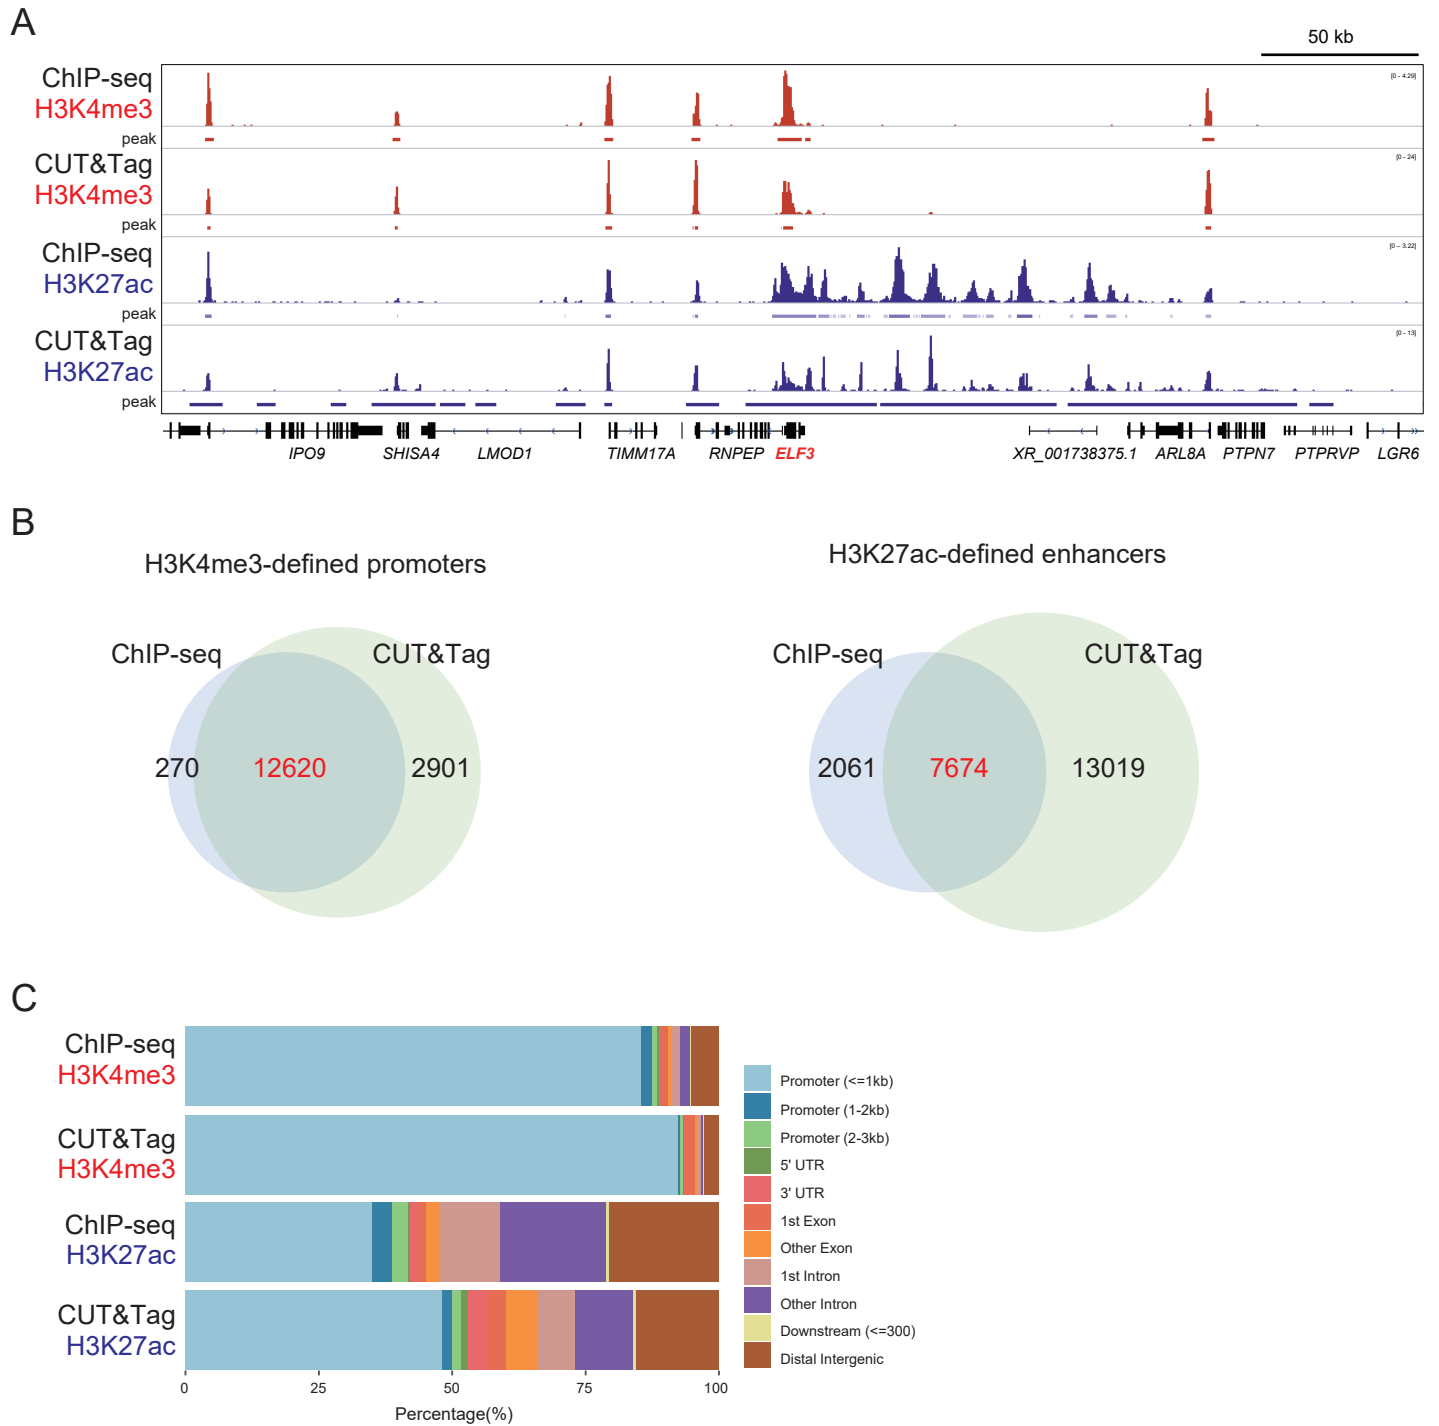

Figure S2. Comparison between ChIP-seq and CUT&Tag in A99 cells.

A. IGV visualization of ChIP-seq and CUT&Tag signals for H3K4me3 and H3K27ac around *ELF3* genomic locus in A99 cells. B. Venn diagram showing overlapped ChIP-seq and CUT&Tag peaks in the H3K4me3-defined promoter (left) and H3K27ac-defined enhancer (right) in A99 cells. C. Bar chart showing the annotation of ChIP-seq and CUT&Tag for H3K4me3 and H3K27ac in A99 cells.
