# Supplementary material for: An integrative epigenomic approach identifies ELF3 as an oncogenic regulator in ASCL1‐positive neuroendocrine carcinoma
Source: PubMed Central journal article supplement — Cancer Sci. 2023 Mar 15;114(6):2596–608. doi: 10.1111/cas.15764 (PMC10236617; doi:10.1111/cas.15764), 2023-03-15
Supplement: CAS-114-2596-s010.pdf [file CAS-114-2596-s010.pdf]

# Supplementary Figure S9

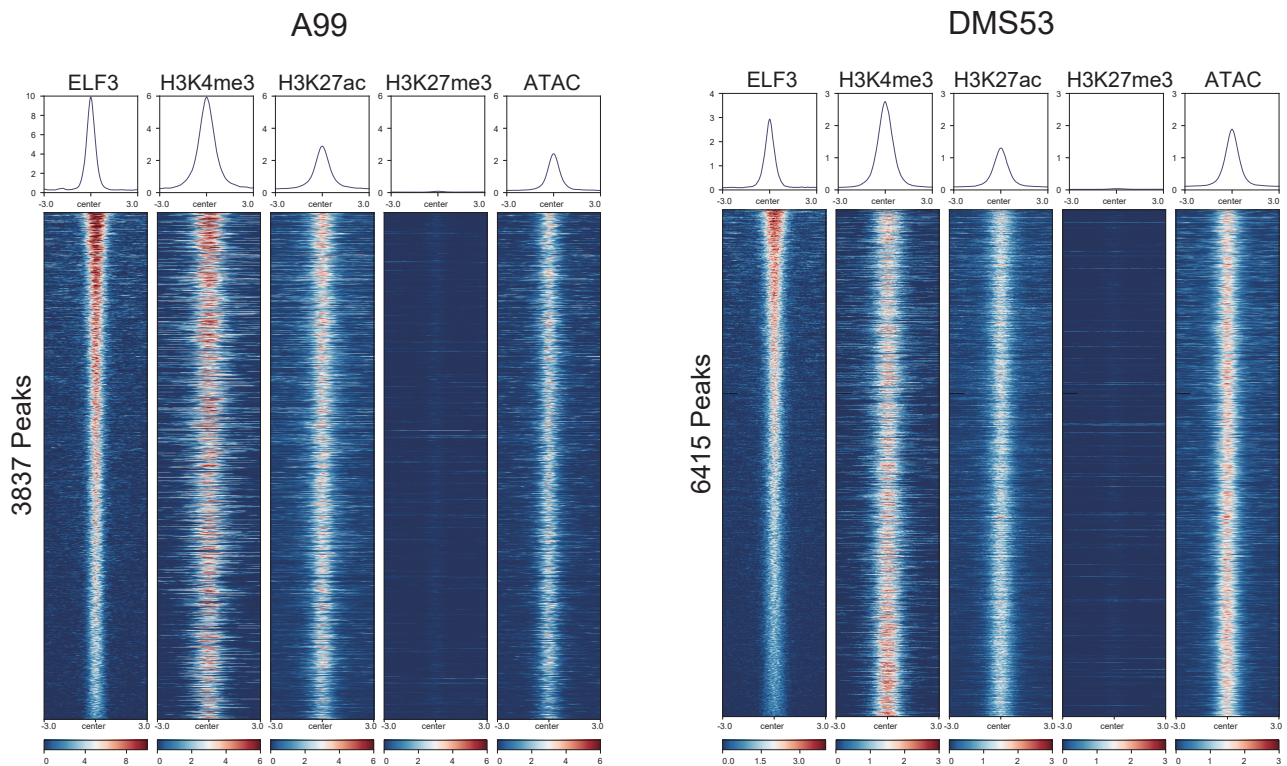

Figure S9. Heatmap of ATAC-seq and CUT&Tag signal around ELF3 genomic binding regions. Heatmap of ATAC-seq and CUT&Tag (H3K4me3, H3K27ac, H3K27me3, and ELF3) signal around ELF3 genomic binding regions in A99 (left) and DMS53 cells (right). Regions are shown in the descending order of signal intensity of ELF3 CUT&Tag.
