# Supplementary material for: An integrative epigenomic approach identifies ELF3 as an oncogenic regulator in ASCL1‐positive neuroendocrine carcinoma
Source: PubMed Central journal article supplement — Cancer Sci. 2023 Mar 15;114(6):2596–608. doi: 10.1111/cas.15764 (PMC10236617; doi:10.1111/cas.15764), 2023-03-15
Supplement: CAS-114-2596-s011.pdf [file CAS-114-2596-s011.pdf]

## Supplementary Figure S4

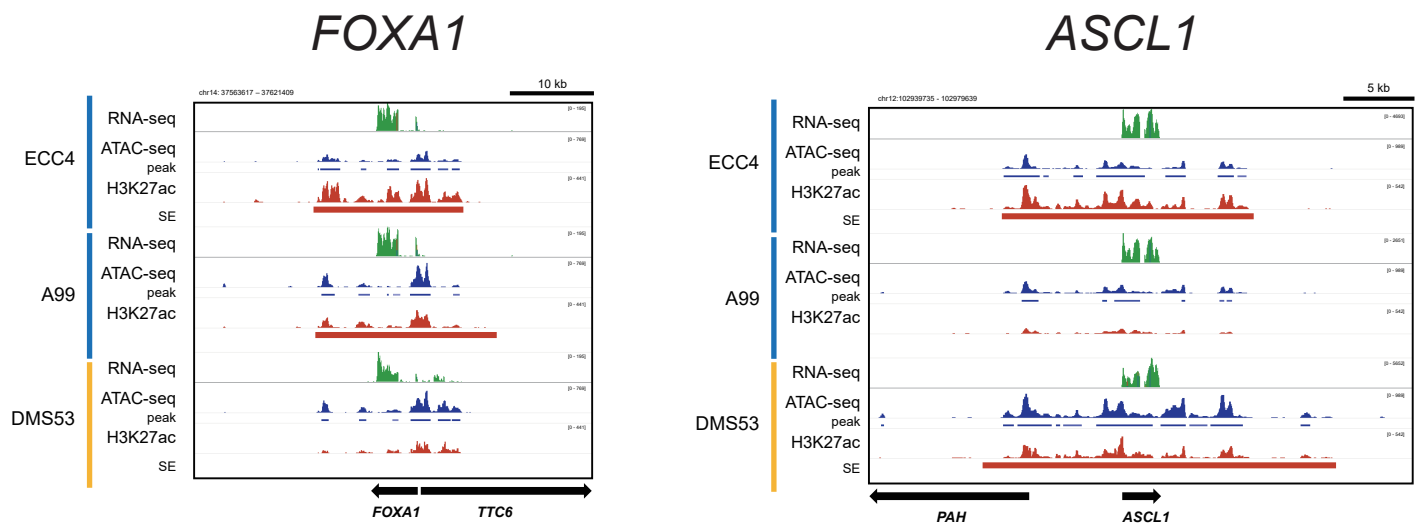

Figure S4. IGV visualization around the genomic loci of *FOXA1* and *ASCL1*.

RNA-seq signals, ATAC-seq signals and peaks, and H3K27ac CUT&Tag signals and super-enhancers (SE) around the *FOXA1* (left) and *ASCL1* (right) genomic loci in ECC4, A99, and DMS53 cells.
