# Supplementary material for: An integrative epigenomic approach identifies ELF3 as an oncogenic regulator in ASCL1‐positive neuroendocrine carcinoma
Source: PubMed Central journal article supplement — Cancer Sci. 2023 Mar 15;114(6):2596–608. doi: 10.1111/cas.15764 (PMC10236617; doi:10.1111/cas.15764), 2023-03-15
Supplement: CAS-114-2596-s012.pdf [file CAS-114-2596-s012.pdf]

# Supplementary Figure S7

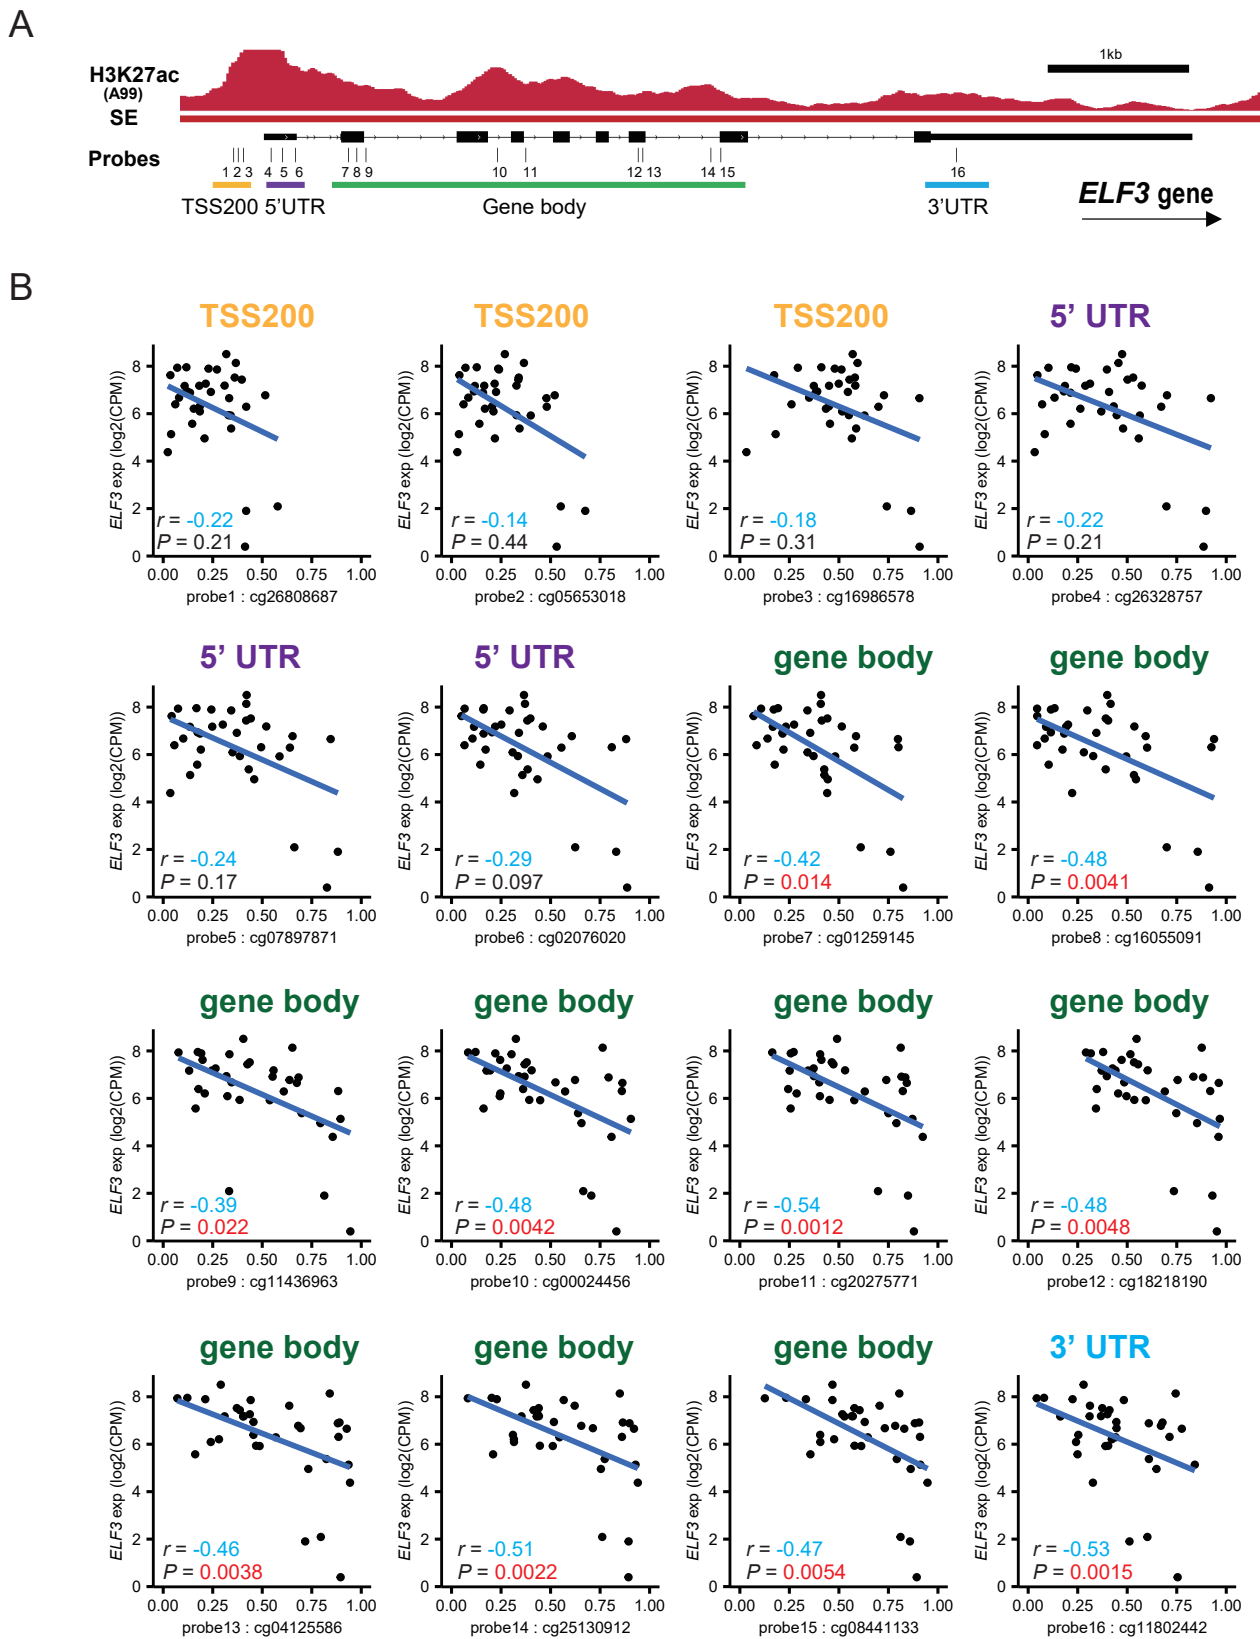

Figure S7. Correlations between DNA methylation and gene expression of *ELF3* in GIS-NEC.

A. H3K27ac signals, super-enhancer regions, and positions of 16 probes of the Infinium MethylationEPIC BeadChip around the *ELF3* gene locus. B. Dot plots showing correlations between DNA methylation of the *ELF3* gene locus and *ELF3* expression. The X-axis indicates  $\beta$ -values of each probe, and the Y-axis indicates the gene expression of *ELF3* based on RNA-seq in 34 GIS-NEC samples.
