# Supplementary material for: An integrative epigenomic approach identifies ELF3 as an oncogenic regulator in ASCL1‐positive neuroendocrine carcinoma
Source: PubMed Central journal article supplement — Cancer Sci. 2023 Mar 15;114(6):2596–608. doi: 10.1111/cas.15764 (PMC10236617; doi:10.1111/cas.15764), 2023-03-15
Supplement: CAS-114-2596-s013.pdf [file CAS-114-2596-s013.pdf]

# Supplementary Figure S13

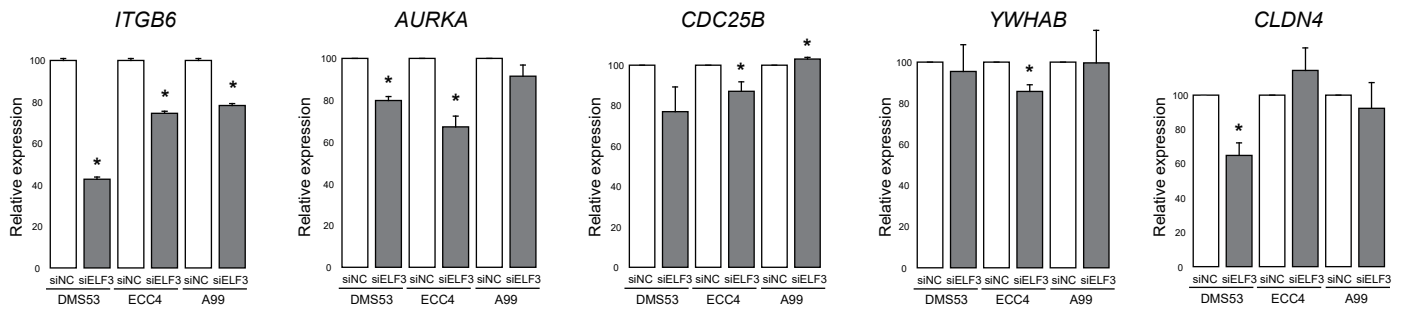

Figure S13. Quantitative RT-PCR analysis of ELF3-regulated genes.

Total RNA was collected 48 h after *ELF3* knockdown in DMS53, ECC4, and A99 cells, and the regulation of *ITGB6*, *AURKA*, *CDC25B*, *YWHAB*, and *CLDN4* by *ELF3* was validated by performing quantitative RT-PCR. \* indicates  $P < 0.05$ . Data are expressed as the mean + SEM of three independent experiments.
