# Supplementary material for: An integrative epigenomic approach identifies ELF3 as an oncogenic regulator in ASCL1‐positive neuroendocrine carcinoma
Source: PubMed Central journal article supplement — Cancer Sci. 2023 Mar 15;114(6):2596–608. doi: 10.1111/cas.15764 (PMC10236617; doi:10.1111/cas.15764), 2023-03-15
Supplement: CAS-114-2596-s014.pdf [file CAS-114-2596-s014.pdf]

## Supplementary Figure S11

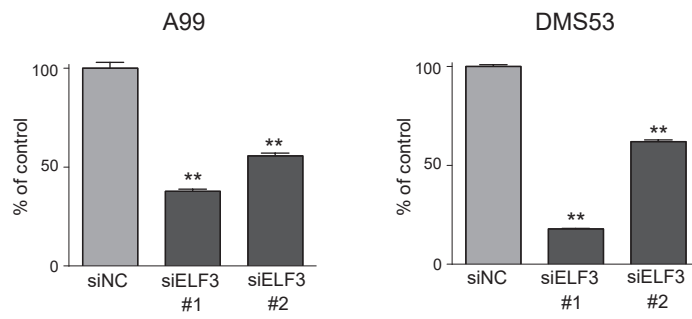

Figure S11. Cell viability assay after *ELF3* knockdown.

Bar chart showing cell viability at 96 h after *ELF3* knockdown mediated by siRNA in ECC4 and DMS53 cells.

Data are representative of three independent experiments. \*\*,  $P < 0.01$
